# Supplementary material for: A global live cell barcoding approach for multiplexed mass cytometry profiling of mouse tumors
Source: PubMed Central journal article supplement (PMC8119183; doi:10.1172/jci.insight.143283), 2021-04-08
Supplement: jciinsight-6-143283-s011.pdf [file jciinsight-6-143283-s011.pdf]

## **SUPPLEMENTARY DATA**

### **Supplementary Figures 1-6**

**Supplementary Table S1.** Top candidate surface markers for barcoding from Cell Surface Protein Atlas (*separately attached as an excel file*)

**Supplementary Table S2.** Mouse RNAseq data from ImmGen (Reference Populations) (*separately attached as an excel file*)

**Supplementary Table S3.** Mouse cell line information

**Supplementary Table S4.** Mouse immune profiling panel

**Supplementary Table S5.** Cell type annotations (*separately attached as an excel file*)

**References Related to Supplementary Table S3**

## Supplementary Figure 1. Cell Surface Protein Atlas

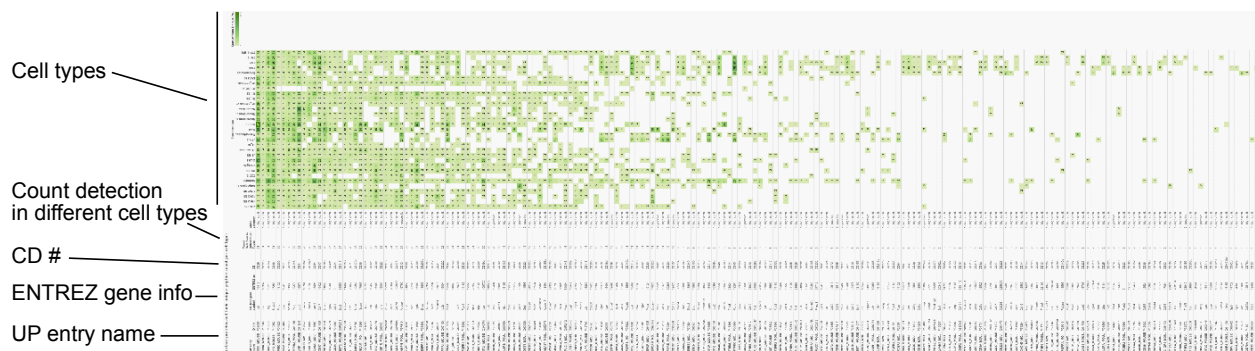

The Cell Surface Protein Atlas utilizes Cell Surface Capture (CSC) technology to generate the above cellular surfaceome snapshot. The database shows protein expression in various cell types and has filters that allow results to be narrowed. This representative snapshot was captured prior to applying filters and serves only to give an overview of the resource.

Supplementary Figure 2. CD29 and CD98 expression in mouse cancer cell lines via CYTOF

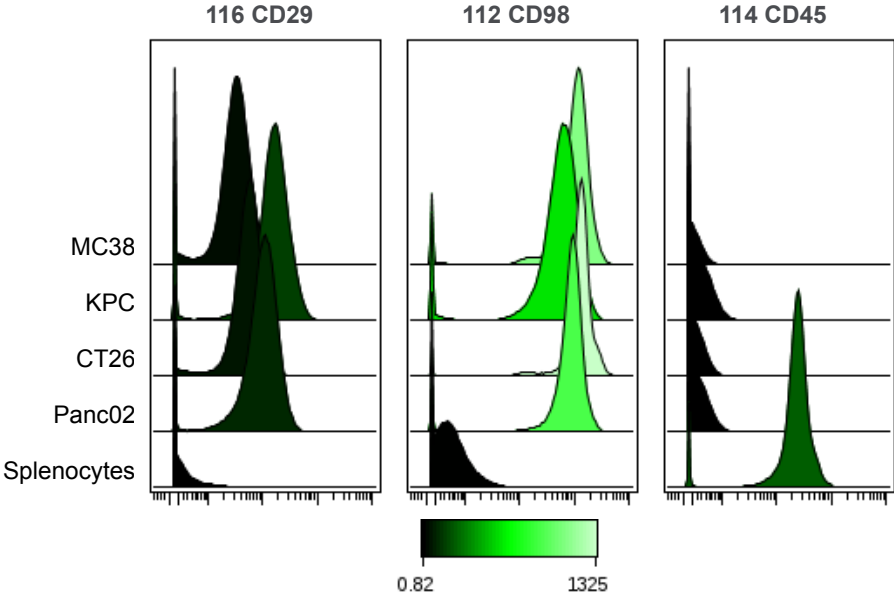

CytoTOF was utilized to test the expression of CD29 and CD98 in addition to CD45 which serves as a control. These markers were tested in the following cancer cell lines: MC38, KPC, CT26, and Panc02 in addition to splenocytes to confirm that these antigens are robustly assayable by CyTOF in our cell lines.

### Supplementary Figure 3. Testing metal conjugated CD29

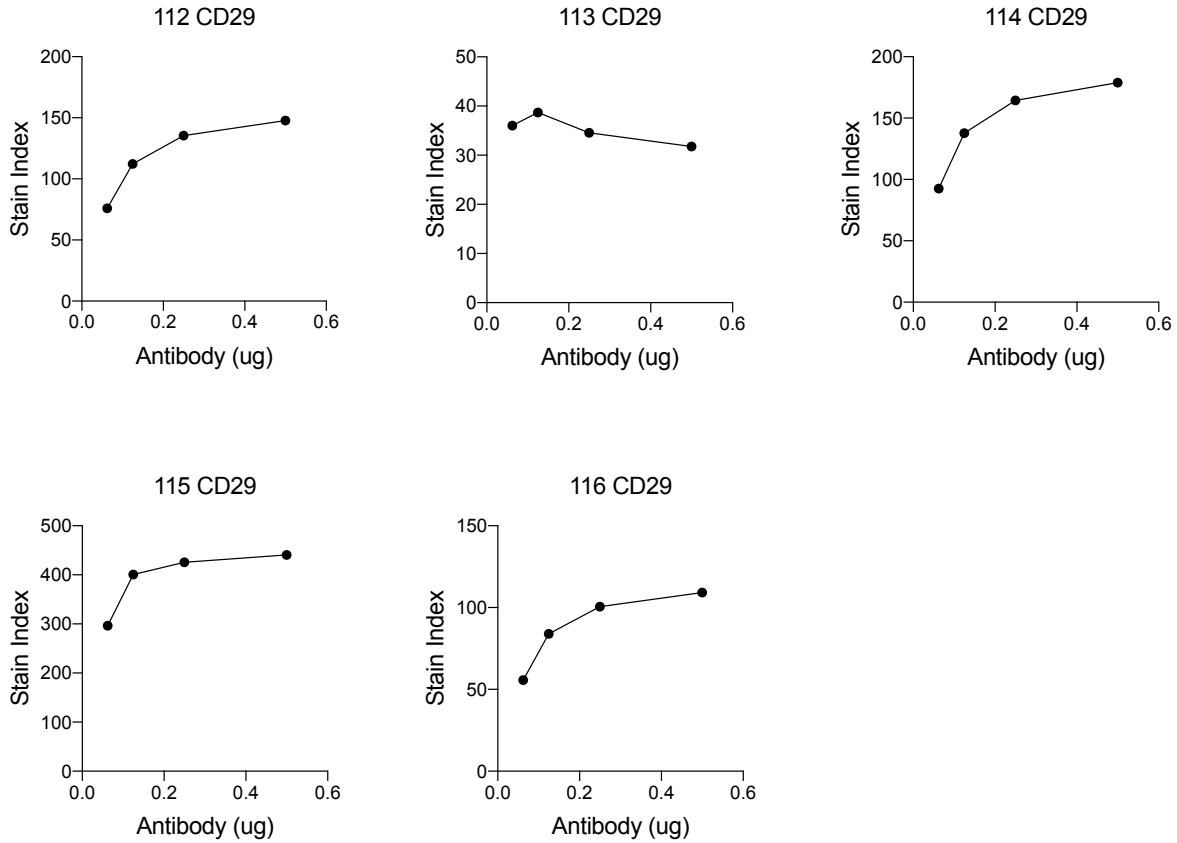

The conjugated anti-CD29 antibodies were tested at four different concentrations (0.0625 $\mu$ g/100 $\mu$ l, 0.125 $\mu$ g/100 $\mu$ l, 0.25 $\mu$ g/100 $\mu$ l, and 0.5 $\mu$ g/100 $\mu$ l) to ensure sufficient staining signal and used to stain MC38. Mean metal intensities of the positive and negative cell populations for each antibody as well as standard deviations of the negative cell populations were used to calculate the staining indexes ( $MMI_{pos} - MMI_{neg} / 2\sigma_{neg}$ ) for each antibody at all four concentrations.

## Supplementary Figure 4. Hierarchical gating strategy to debarcode 10-plex batch of KPC cells

### KPC

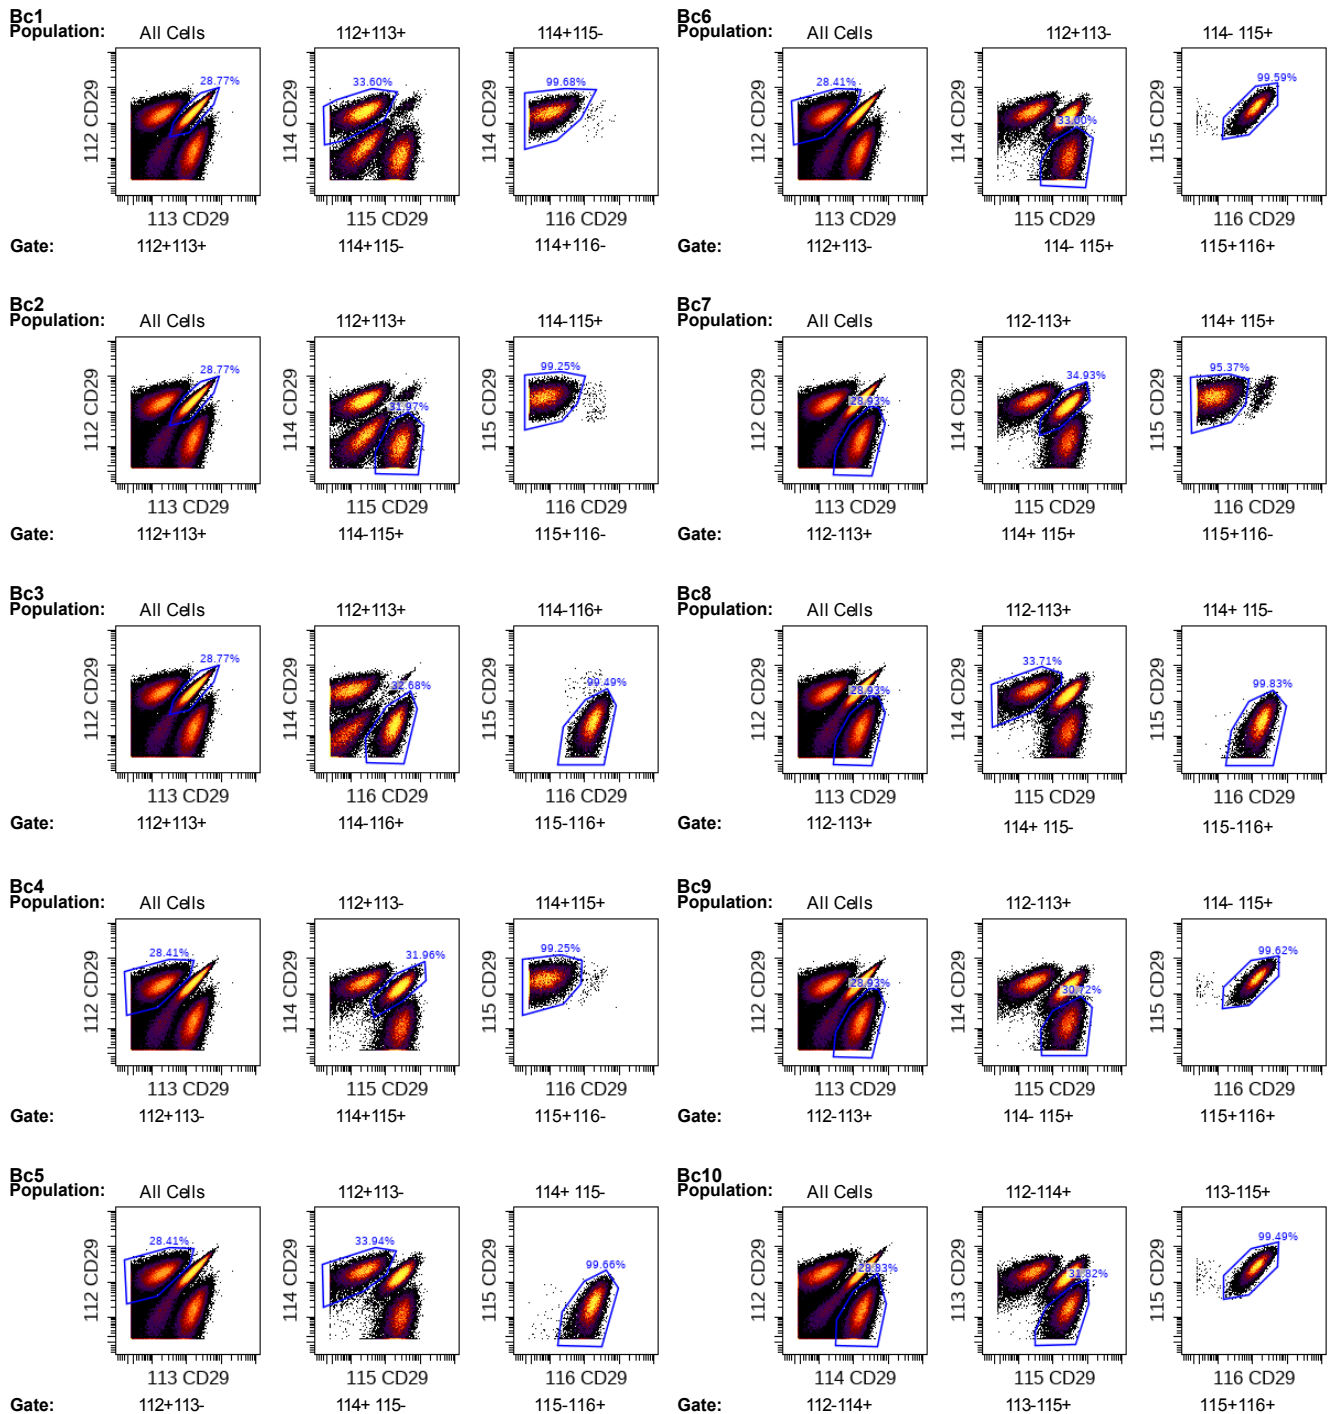

10-plex (5-choose-3) batch of KPC cells are debarcoded by hierarchical gating on Cytobank software by identifying populations that are positive for the three metal channels and negative for the remaining two.

Supplementary Figure 5. Automated debarcoding of 10-plex MC38 and KPC

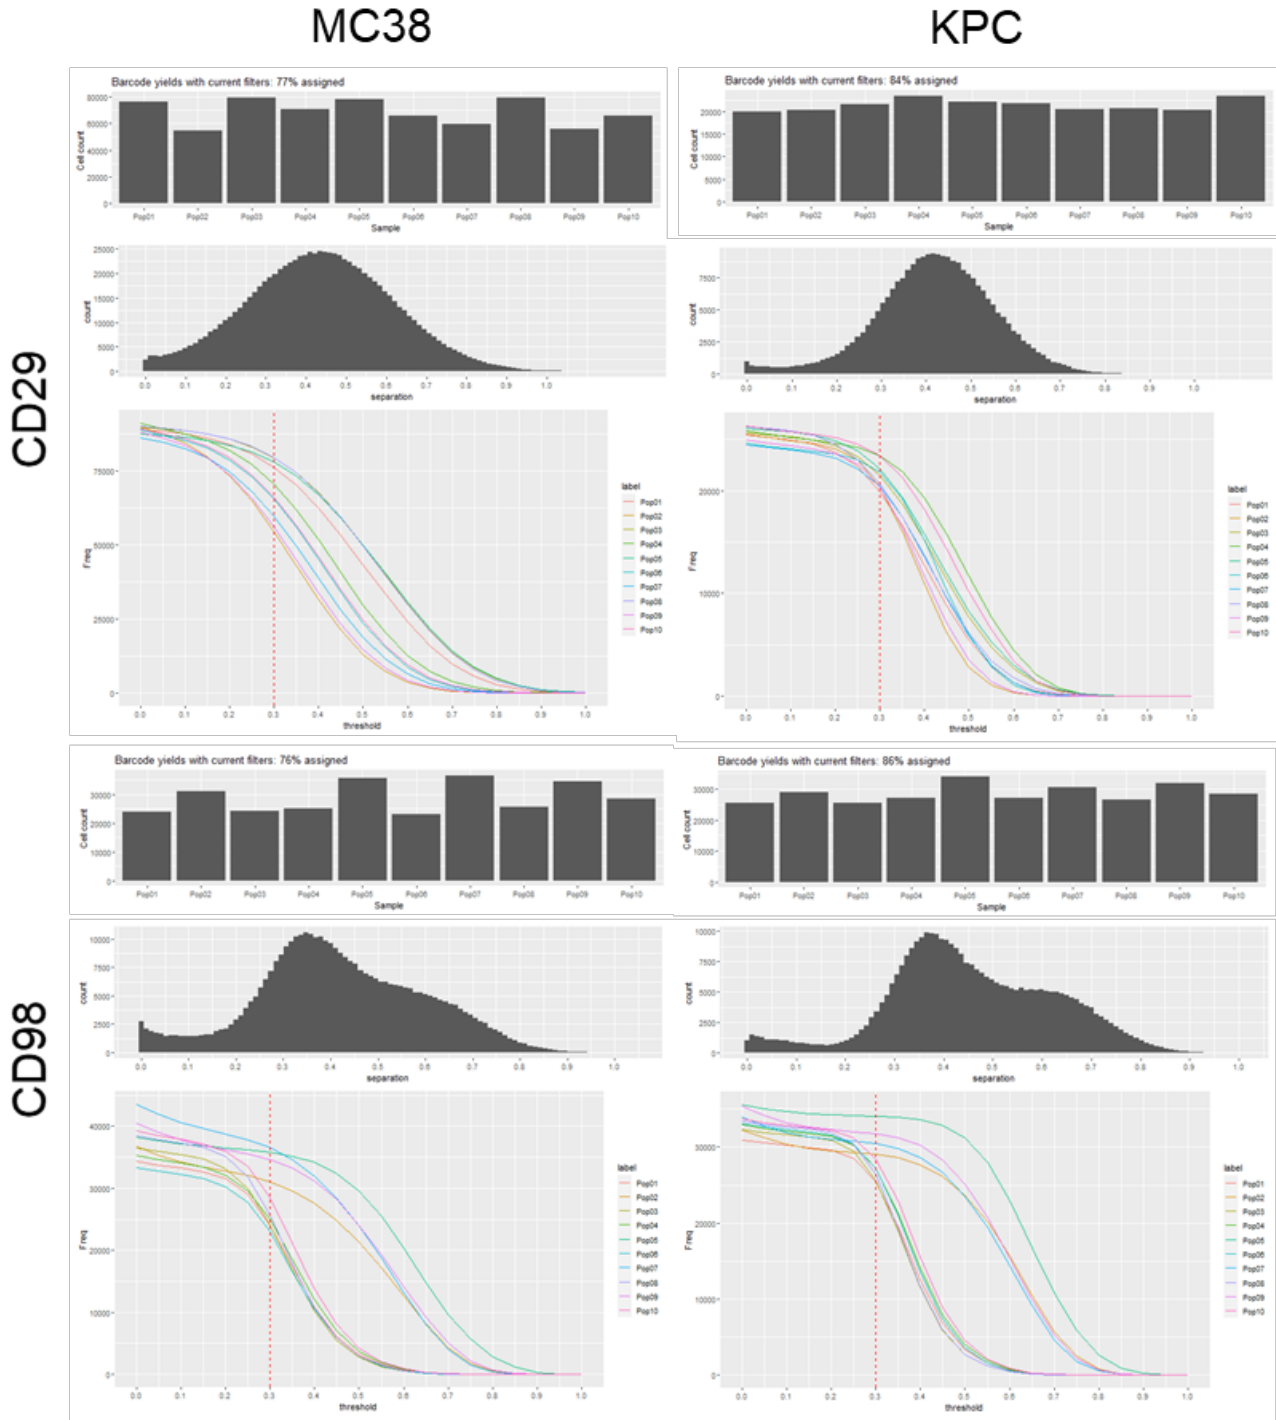

CD29 and CD98-based 10-plex batches of MC38 and KPC cells are debarcoded by Single Cell Debarcoder algorithm (premassa). Bar plots represent the number of cells from each deconvolved sample, retrieving 77%, 84%, 76%, and 86% of the barcoded samples for CD29-based MC38 and KPC batches and CD98-based MC38 and KPC batches, respectively. Separation plot shows barcode yields as a function of the separation threshold (as the threshold increases, the number of cells assigned to each sample decreases; currently selected threshold, 0.3, is displayed as a vertical red line).

**Supplementary Figure 6. Comparison of immune cell type abundances between KPC and MC38**

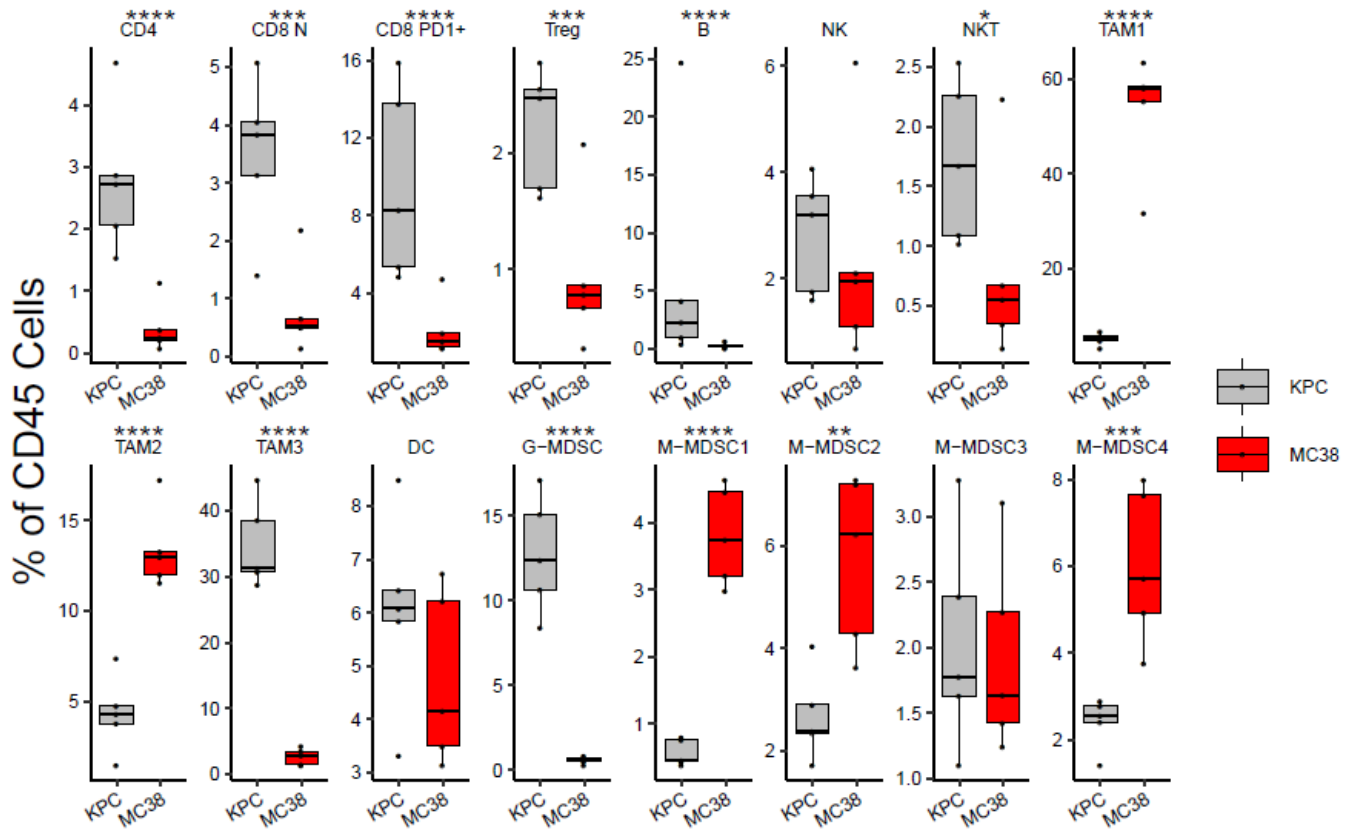

Box plots representation of the same dataset shown on Figure 4D comparing immune cell type abundances within KPC and MC38 tumor models as a percentage of CD45+ cells. FDR adjusted p values by *edgeR* \*\*\*\*<0.0001, \*\*\*<0.005, \*\*<0.01, \*<0.05. Abbreviations: CD8 N, CD8+ naïve T cells; NK, natural killer cells; NKT, natural killer T cells; TAM, tumor-associated macrophages; DC, dendritic cells; G.MDSC/M.MDSC, granulocytic/ monocytic myeloid-derived suppressor cells.

**Supplementary Table S3. Mouse cell line information**

| Name    | Vendor/Source                               | Origins                                                                                                                                                                                                                                     | Culture Methods                                                                                                                                                                                                                                                                           |
|---------|---------------------------------------------|---------------------------------------------------------------------------------------------------------------------------------------------------------------------------------------------------------------------------------------------|-------------------------------------------------------------------------------------------------------------------------------------------------------------------------------------------------------------------------------------------------------------------------------------------|
| MC38    | Kerafast (ENH204-FP)                        | C57BL6 murine colon adenocarcinoma cells.                                                                                                                                                                                                   | Maintained in: <ul style="list-style-type: none"> <li>• DMEM-based media</li> <li>• 10% FBS</li> <li>• 1% L-glutamine</li> <li>• 1% penicillin/streptomycin</li> <li>• 1% HEPES</li> <li>• 1% sodium pyruvate</li> <li>• 1% non-essential amino acids</li> <li>• 5% CO2 at 37C</li> </ul> |
| CT26.WT | ATCC (CRL-2638)                             | <i>N</i> -nitroso- <i>N</i> -methylurethane-induced BALB/c (H-2 <sup>d</sup> ) undifferentiated colon carcinoma(1).                                                                                                                         | Maintained in: <ul style="list-style-type: none"> <li>• RPMI 1640 with glutamine</li> <li>• 10% FBS</li> <li>• 1% penicillin/streptomycin</li> <li>• 1% sodium pyruvate</li> <li>• 1% non-essential amino acids</li> <li>• 5% CO2 at 37C</li> </ul>                                       |
| B16-F10 | ATCC (CRL-6475)                             | B16 melanoma tumor lines were selected for their ability to form pulmonary tumor nodules(2).                                                                                                                                                | Maintained in: <ul style="list-style-type: none"> <li>• DMEM-based media</li> <li>• 10% FBS</li> <li>• 1% penicillin/streptomycin</li> <li>• 1% sodium pyruvate</li> <li>• 1% non-essential amino acids</li> <li>• 5% CO2 at 37C</li> </ul>                                               |
| KPC     | Johns Hopkins University School of Medicine | Derived from transgenic mice harboring pancreas specific KrasG12D and p53R172H mutations(3).                                                                                                                                                | Maintained in: <ul style="list-style-type: none"> <li>• RPMI 1640 with glutamine containing 10% FBS</li> <li>• 1% penicillin/streptomycin</li> <li>• 1% sodium pyruvate</li> <li>• 1% non-essential amino acids</li> <li>• 5% CO2 at 37C</li> </ul>                                       |
| Panc02  | Johns Hopkins University School of Medicine | Cotton thread-carrying 3-methyl-cholanthrene was implanted into the pancreas of C57BL/6 mice. Of the mice that developed ductal adenocarcinomas, a tumor of C57BL/6 origin (Panc02) was established in a serial subcutaneous transplant(4). | Maintained in: <ul style="list-style-type: none"> <li>• DMEM-based media</li> <li>• 10% FBS</li> <li>• 1% penicillin/streptomycin</li> <li>• 1% L-glutamine</li> <li>• 10% CO2 at 37C.</li> </ul>                                                                                         |

The vendor, origin, and culture methods of mouse cell lines used to test antigen expression.



**Supplementary Table S4. Mouse immunoprofile panel****Surface Staining**

| <b>Mass</b> | <b>Marker</b> | <b>Clone</b> | <b>Titration</b> | <b>Source</b> |
|-------------|---------------|--------------|------------------|---------------|
| 141         | Ly6G          | 1A8          | 1:50             | Fluidigm      |
| 142         | CD11c         | N418         | 1:100            | Fluidigm      |
| 145         | CD69          | H1.2F3       | 1:100            | Fluidigm      |
| 146         | F4/80         | BM8          | 1:100            | Fluidigm      |
| 148         | CD11b         | M1/70        | 1:100            | Fluidigm      |
| 149         | CD19          | 6D5          | 1:100            | Fluidigm      |
| 150         | Ly6C          | HK1.4        | 1:100            | Fluidigm      |
| 151         | CD25          | 3C7          | 1:100            | Fluidigm      |
| 152         | CD3e          | 145-2C11     | 1:100            | Fluidigm      |
| 153         | PDL1          | 10F.9G2      | 1:100            | Fluidigm      |
| 155         | CD45          | 30-F11       | 1:100            | Biolegend (c) |
| 159         | CD279 (PD-1)  | 29F.1A12     | 1:100            | Fluidigm      |
| 161         | CD40          | HM40-3       | 1:50             | Fluidigm      |
| 164         | CD62L         | MEL-14       | 1:100            | Fluidigm      |
| 168         | CD8a          | 53-6.7       | 1:50             | Fluidigm      |
| 170         | NK1.1         | PK136        | 1:50             | Fluidigm      |
| 171         | CD44          | IM7          | 1:100            | Fluidigm      |
| 172         | CD4           | RM4-5        | 1:200            | Fluidigm      |
| 176         | B220          | RA3-6B2      | 1:100            | Fluidigm      |
| 209         | MHCII IA/IE   | M5/114.15.2  | 1:100            | Fluidigm      |

Surface mouse immunoprofile panel. Please note, antibody sources are listed, custom antibodies indicated by "(c)" were comprised of purified antibodies from Biolegend conjugated to their respective metal according to the manufacturer's protocol.

## REFERENCES (RELATED TO SUPPLEMENTARY TABLE S3)

1. Wang M et al. Active immunotherapy of cancer with a nonreplicating recombinant fowlpox virus encoding a model tumor-associated antigen. *J. Immunol. Baltim. Md 1950* 1995;154(9):4685–4692.
2. Fidler IJ. Biological behavior of malignant melanoma cells correlated to their survival in vivo. *Cancer Res.* 1975;35(1):218–224.
3. Hingorani SR et al. Trp53R172H and KrasG12D cooperate to promote chromosomal instability and widely metastatic pancreatic ductal adenocarcinoma in mice. *Cancer Cell* 2005;7(5):469–483.
4. Corbett TH et al. Induction and chemotherapeutic response of two transplantable ductal adenocarcinomas of the pancreas in C57BL/6 mice. *Cancer Res.* 1984;44(2):717–726.
